# Supplementary material
Source: HighWire-hosted journal article supplement (https://ijssurgery.com/content/8704)
Supplement: inline-supplementary-material-1 [file inline-supplementary-material-1.docx]

Appendix Table 1. Univariate Logistic Analysis of Patient Variables Leading to Traumatic Spinal Cord Injuries

|  | Total | |
| --- | --- | --- |
|  | Odds Ratio | P value |
| BMI (continuous) | 0.94 | 0.47 |
| Prelaw or Not | 17.1 | 0.99 |
| Postlaw or Not | 0.0 | 0.99 |
| Age (Continious) | 0.99 | 0.93 |
| Age >50 | 0.51 | 0.42 |
| White | 0.32 | 0.18 |
| Black | 4.2 | 0.09 |
| Other | 0.0 | 0.99 |
| Female | 1.6 | 0.68 |
| Ethnicity | 0.0 | 0.99 |
